# Supplementary material for: Synthesis of core–shell polyurethane–urea nanoparticles containing 4,4′-methylenedi-p-phenyl diisocyanate and isophorone diisocyanate by self-assembled neutralization emulsification
Source: Royal Society of Chemistry journal article supplement (doi:10.1039/b409755f), 2004-01-01
Supplement: b409755f.doc [file b409755f.doc]

**Supplementary** **data**

**Synthesis of core-shell polyurethane–urea particles containing 4,4’ –methylenedi–*p*–phenyl diisocyanate and isophorone diisocyanate by self-assembled neutralization emulsification**

# In Woo Cheong* and Jung Hyun Kim

*Yonsei Center for Nanotechnology, Yonsei University, 134 Shinchon-dong, Seodaemoon-ku, Seoul 120-749, South Korea.* *E-mail: chiw@yonsei.ac.kr*

***Experimental details and characterizations of the MDI–IPDI nanoparticles***

**1. Molecular weight and structure analyses**

The average molecular weights (: weight-average and : number-average) and polydispersity index (PDI, /) were measured by gel permeation chromatography (GPC) using a Waters liquid chromatograph equipped with a series of *m*Styragelâ columns (HR1, HR4, HR5 and HR5E), isocratic HLPC pump (Waters 1515), Autosampler (Waters 717), 2410 differential refractometer (RI detector), and integrator at 40. Tetrahydrofuran (THF) was used as an eluent at a flow rate of 1.0ml min–1 and 1.0´103 Pa pump pressure. Molecular weight calibration was carried out using polystyrene standards having molecular weight in the range from 1.024´103 to 3.9´106g mol–1. Universal calibration was done with polyurethane Mark-Houwink-Sakurada constants K = 2.9´10-4 dl g-1 and a = 0.70.27,28 UV spectrophotometer (UV–1601PC, Shimadzu Co.) with a flow cell kit was connected with GPC in serial to measure the elution time of the MDI–IPDI PU prepolymers and intermediates at 282 nm. Their chemical structures were confirmed by using 1H– and 13C–NMR (in DMSO, AMX–500, Brucker Co.) and FT–IR at 25.

**2. Crystalline analysis**

X–ray diffraction patterns in medium–wide angle (WAXD) of the cast films were obtained using a X–ray diffractometer (D/MAX–2500, Rigaku Denki Co.) with filtered CuK radiation of wave length, 1.5404. The 2**–scanning rate was 4°min–1 ranging from 5 to 60°. Differential scanning calorimeter (DSC Q10, TA Instruments) was used to examine the melting temperature variation with MDI content. Heating rate was 5min–1 under N2 purge of 20ml min–1. The sample size was ca. 10 mg in a sealed aluminum pan. DSC data was obtained at a temperature range from –80 to 200.

**3. Particle morphology analysis**

The average particle size and –potential of the WPUU nanoparticles were measured using dynamic light scattering method (BI–particle sizer ZPA, Brookhaven Inst. Co.) at room temperature. All samples were diluted with DI water and re–dispersed by sonicator (Ultrasonic Processor, VCX–500, Watt, Sonics & Materials, Inc.) with a micro–tip at 20 % power. Morphology of the WPUU nanoparticles was observed by transmission electron microscopy (TEM, Philips CM200, Philips Electronics) with ultra-thin microtoming technique. 0.1 g latex (22% solid content) was mixed with the 3g epoxy resin (YD128, Kukdo Chem, Korea) and 0.3g curing agent using 5mm diameter cylindrical mold. After hardening, cross-linked epoxy samples were ultramicrotomed with 60nm thickness. Slices of the sample were mounted onto the carbon–coated TEM grids and positively stained with RuO4 vapor. For better contrast, the samples were dipped into 4% phosphotungstic acid solution and dried at room temperature before measuring.

**3. Example of 1H- and 13**C- NMR spectra of core-shell sample (B)

| Name | Chemical structure | Assignment | |
| --- | --- | --- | --- |
| H and C species | Chemical shift  (ppm) |
| Isophorone diisocyanate (IPDI) |  | 1H*a*  2H*b*  3H  5-7H  8,9,11H  10H  1C*a*  2C*b*  3C  4, 12C  5-7C  8,9,11C  10C | 5.4-6.0 (*trans*)  6.8-7.2 (*cis*)  6.8-7.2  2.72  1.4-1.9  0.9-1.2  3.2-3.842  155.8  157.5  56.1  N/A*c*  42-49  22-27  36.2 |
| Poly(tetramet-hylene adipate glycol) (PTMA) |  | 13H  14H  16H  17H  13C  14C  15C  16C  17C | 4.02  1.52  2.29  1.61  63.2  24.7  172.6  33.1  23.8 |
| Dimethylol propionic acid (DMPA, neutralized with TEA) |  | 18H  19H  22H  23H  18C  19C  20C  21C  22C  23C | 4.11  1.09  N/A*c*  N/A*c*  65.5  17.4  N/A*c*  174.3  N/A*c*  N/A*c* |
| Ethylene diamine (EDA) |  | 24, 26H  27H  25C  27C | N/A*c*  2.99  N/A*c*  N/A*c* |
| 4,4’–methylenedi–*p*–phenyl diisocyanate (MDI) |  | 28H*d*  30H  31H  33H  28C*d*  29C  30C  31C  32C  33C | 8.03  7.34  7.07  3.78  153.3  135.5  118.3  128.8  137.1  N/A*c* |

*a* Primary urethane bond of IPDI; *b* secondary urethane bond of IPDI; *c* not available due to weak intensity; *d* urethane bond of MDI

**4. FT-IR spectra of the samples (A,B, and C)**

FT–IR spectra of the pure IPDI and MDI 50 WPUU samples (KBr, cm–1): (a) free N–H at 3450, (b) hydrogen bonded N–H at 3370–3340, (c) free and hydrogen bonded C=O in urethane or urea at 1740–1645, (d) C–C stretching in phenyl at 1599, (e) C–N stretching–N–H bending at 1533, (f) CH OOP bending in phenyl at 818, and (g) CH OOP bending in phenyl at 513.

**
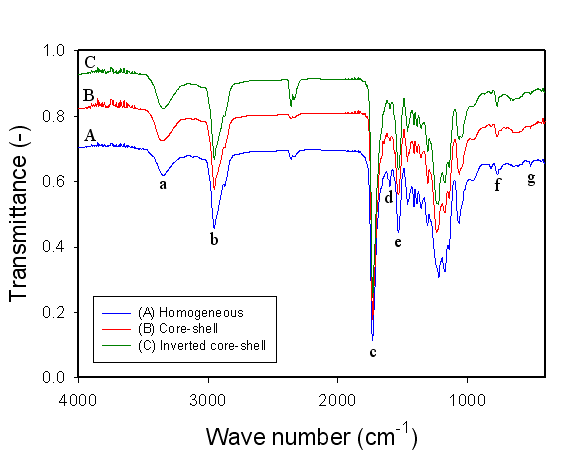
**
